# Supplementary material
Source: HighWire-hosted journal article supplement (https://bmjopen.bmj.com/content/12/4/e053118)
Supplement: inline-supplementary-material-1 [file inline-supplementary-material-1.pdf]

## Multi-IMPROD2.0

|            |             |                      |
|------------|-------------|----------------------|
| _____      | _____       | □□.□□.□□             |
| Sukunimi   | Etunimi     | Syntymäaika (ppkkvv) |
| _____      | _____       | _____                |
| Katuosoite | Postinumero | Postitoimipaikka     |
|            |             | Puhelin              |

## SUOSTUMUSASIAKIRJA

## INFORMED CONSENT FORM

## SUOSTUMUS

Minua on pyydetty osallistumaan tutkimukseen, jossa selvitetään magneettikuvaksen ja minun ominaisuuksieni perusteella luodun riskiarvion soveltuvuutta arvioida eturauhasen koepalojen tarpeellisuutta.

Olen lukenut ja ymmärtänyt saamani kirjallisen tutkimustiedotteen. Tiedotteesta olen saanut riittävän selvityksen tutkimuksesta ja sen yhteydessä suoritettavasta henkilötietojen keräämisestä, käsittelystä ja luovuttamisesta. Tiedotteen sisältö on kerrottu minulle myös suullisesti, minulla on ollut mahdollisuus esittää kysymyksiä ja olen saanut riittävän vastauksen kaikkiin tutkimusta koskeviin kysymyksiini.

Tiedot antoi \_\_\_\_\_ / \_\_\_\_ 201\_\_.

Minulla on ollut riittävästi aikaa harkita osallistumistani tutkimukseen. Olen saanut riittävät tiedot oikeuksistani, tutkimuksen tarkoituksesta ja sen toteutuksesta sekä tutkimuksen hyödyistä ja riskeistä. Minua ei ole painostettu eikä houkuteltu osallistumaan tutkimukseen.

Tiedän, että tietojani käsitellään luottamuksellisesti eikä niitä luovuteta sivullisille. Kansainväliselle yhteistyökumppaneille tietoja ja näytteitä luovutetaan ainoastaan koodattuina niin, että heillä ei ole mahdollisuutta tunnistaa näistä yksittäisiä potilaita.

Ymmärrän, että osallistumiseni on vapaaehtoista. Olen selvillä siitä, että voin peruuttaa tämän suostumukseni koska tahansa syytä ilmoittamatta eikä peruutukseni vaikuta kohteluuni tai saamaani hoitoon millään tavalla.

Olen tietoinen siitä, että mikäli keskeytän tutkimuksen tai peruutan suostumukseni, minusta keskeyttämiseen ja suostumukseni peruuttamiseen mennessä kerättyjä tietoja ja näytteitä voidaan käyttää osana tutkimusaineistoa.

**Allekirjoituksellani vahvistan osallistumiseni tähän tutkimukseen ja suostun vapaaehtoisesti tutkimushenkilöksi.**

\_\_\_\_\_/\_\_\_\_201\_\_  
paikka ja aika

\_\_\_\_\_  
tutkimushenkilön allekirjoitus

Vakuutan, että olen antanut tutkittavalle ennen tämän asiakirjan allekirjoittamista riittävän selvityksen tutkittavan oikeuksista sekä tutkimukseen liittyvistä yksityiskohdista siten kuin lääketieteellisestä tutkimuksesta annetun lain 488/1999 6§:ssä edellytetään. Vakuutan, että kaikkea tutkimuksen aikana saatavaa tietoa käsitellään luottamuksellisesti ja että tutkimusryhmän ulkopuolisille annettavasta tiedosta (esim. julkaisut) tutkittavien henkilöllisyys ei ole tunnistettavissa. Tutkittavalla on oikeus milloin tahansa tutkimuksen kestäessä (myös syytä ilmoittamatta) peruuttaa suostumuksensa tutkimukseen, ilman että peruutus vaikuttaisi tutkittavan oikeuteen saada tarvitsemaansa hoitoa.

Turussa \_\_\_\_/\_\_\_\_201\_\_

\_\_\_\_\_  
tutkijalääkäriin allekirjoitus ja nimenselvennys

Versio 1.0 / 29.8.2019

Alkuperäinen suostumusasiakirja arkistoidaan tutkijan kansioon ja tutkittavalle annetaan kopio. (Vaihtoehtoisesti täytetään ja allekirjoitetaan kaksi samansisältöistä kappaletta, joista toinen arkistoidaan tutkijan kansioon ja toinen annetaan tutkittavalle.)
