# Supplementary material
Source: HighWire-hosted journal article supplement (https://bmjopen.bmj.com/content/12/4/e053118)
Supplement: inline-supplementary-material-2 [file inline-supplementary-material-2.pdf]

## MONITORING PLAN

1(1)

Study name: Multi-IMPROD2.0  
 Study code: T326/2019  
 EurdraCT number: Not applicable  
 Sponsor / Investigator: Turku University Hospital  
 Name of study site: Turku University Hospital  
 Duration of the study: 02/2020-02/2026  
 Planned No. of subjects: 600

**EXTENT OF MONITORING**

Minimum monitoring as specified by the organisation to implement the obligations of quality policy and good clinical practice.

**ITEMS TO BE MONITORED** (detailed description)

- **Study initiation visit**

- **1<sup>st</sup> monitoring in the beginning of the study:**

*Items to be checked are:*

*Study documentation in investigator's trial file*

*Informed consents of screened and enrolled study subjects*

*CRFs completed by the date of monitoring visit of 1-2 first enrolled subjects.*

*Timing for the visit is Feb-2021.*

- **2<sup>nd</sup> monitoring visit after the recruitment has been completed:**

*Items to be checked are:*

*Informed consents of all screened and enrolled patients*

*Main parameters in CRFs of all study subjects:*

*Inclusion and exclusion criteria*

*Overall PI-RADS-score of the prostate*

*If TRUs-guided biopsies are performed, the overall histopathological gleason grade of the prostate*

*(Serious) Adverse events*

*Study documentation in investigator's study file.*

*Planned timing for the visit is Feb-2022.*

- **3<sup>rd</sup> monitoring visit after last patient has completed the study:**

*Items to be checked are:*

*study documentation of investigator's study file.*

*Planned timing for the visit is Feb-2026.*

**Estimated time used for monitoring**

- *1<sup>st</sup> monitoring visit 10h*
- *2<sup>nd</sup> monitoring visit 40h*
- *3<sup>rd</sup> monitoring visit 10h*

**The monitoring plan is valid until further notice and it can be updated by mutual consent.**

Ilkka Nikulainen

\_\_\_\_\_  
Name of Monitor

\_\_\_\_\_  
Date

\_\_\_\_\_  
Signature

Peter Boström

\_\_\_\_\_  
Name of Sponsor/Investigator

\_\_\_\_\_  
Date

\_\_\_\_\_  
Signature

Version 1.0. 03-Jan-2021
